# Supplementary material for: Automated Training for Algorithms That Learn from Genomic Data
Source: Biomed Res Int. 2015 Jan 28;2015:234236. doi: 10.1155/2015/234236 (PMC4324891; doi:10.1155/2015/234236)
Supplement: Supplementary file 1 — The Supplementary Material provides detailed information on the positive and negative seed training sets of proteins. Each protein is listed together with its description, identification number, organism, and the reason for including it in the training set. [file 234236.f1.xls]

## Sheet: Positive Seed Training Set
Identification	Organism	Description	Reference
TGME49_306060	T.gondii	hypothetical protein	ApiLoc: localizes to apical,apicoplast,exported,inner membrane complex
TGME49_299070	T.gondii	pyruvate kinase, putative	ApiLoc: localizes to apical,apicoplast,mitochondrion
PF3D7_1020800	P.falciparum	dihydrolipoamide acyltransferase component E2	ApiLoc: localizes to apicoplast
PF3D7_1467300	P.falciparum	1-deoxy-D-xylulose 5-phosphate reductoisomerase	ApiLoc: localizes to apicoplast
PF3D7_1333000	P.falciparum	cochaperonin	ApiLoc: localizes to apicoplast
PF3D7_0907900	P.falciparum	peptidyl deformylase	ApiLoc: localizes to apicoplast
PF3D7_1440300	P.falciparum	delta-aminolevulinic acid dehydratase	ApiLoc: localizes to apicoplast
TGME49_312110	T.gondii	nucleoredoxin, putative	ApiLoc: localizes to apicoplast
TGME49_221320	T.gondii	acetyl-CoA carboxylase, putative	ApiLoc: localizes to apicoplast
PF3D7_1440200	P.falciparum	stromal-processing peptidase, putative	ApiLoc: localizes to apicoplast
PFC10_API0060	P.falciparum	PFC10_API0060	ApiLoc: localizes to apicoplast
TGME49_271625	T.gondii	seryl-tRNA synthetase, putative	ApiLoc: localizes to apicoplast
TGME49_245670	T.gondii	pyruvate dehydrogenase, putative	ApiLoc: localizes to apicoplast
PF3D7_1411400	P.falciparum	plastid replication-repair enzyme	ApiLoc: localizes to apicoplast
TGME49_305980	T.gondii	dihydrolipoyl dehydrogenase protein, putative	ApiLoc: localizes to apicoplast
PY00573	P.yoelii	dihydrolipoamide dehydrogenase	ApiLoc: localizes to apicoplast
PF3D7_1333200	P.falciparum	ubiquitin-activating enzyme	ApiLoc: localizes to apicoplast
PF3D7_1037100	P.falciparum	pyruvate kinase 2, putative	ApiLoc: localizes to apicoplast
PF3D7_0508800	P.falciparum	single-strand binding protein, putative	ApiLoc: localizes to apicoplast
PF3D7_0815900	P.falciparum	lipoamide dehydrogenase	ApiLoc: localizes to apicoplast
TGME49_288360	T.gondii	tryptophanyl-tRNA synthetase, putative	ApiLoc: localizes to apicoplast
TGME49_222020	T.gondii	phosphoglycerate kinase, putative	ApiLoc: localizes to apicoplast
TGME49_218850	T.gondii	ribosomal protein S9, putative	ApiLoc: localizes to apicoplast
PF3D7_1209600	P.falciparum	porphobilinogen deaminase	ApiLoc: localizes to apicoplast
PY00819	P.yoelii	pyruvate dehydrogenase E1 alpha subunit	ApiLoc: localizes to apicoplast
PF3D7_0208500	P.falciparum	acyl carrier protein	ApiLoc: localizes to apicoplast
PF3D7_1124500	P.falciparum	pyruvate dehydrogenase E1 alpha subunit	ApiLoc: localizes to apicoplast
TGME49_261070	T.gondii	hypothetical protein	ApiLoc: localizes to apicoplast
TGME49_321570	T.gondii	(3R)-hydroxymyristoyl ACP dehydrase, putative	ApiLoc: localizes to apicoplast
TGME49_259260	T.gondii	cell division protein, putative	ApiLoc: localizes to apicoplast
PF3D7_1223300	P.falciparum	DNA gyrase subunit A	ApiLoc: localizes to apicoplast
TGME49_266730	T.gondii	leucyl-tRNA synthetase, putative	ApiLoc: localizes to apicoplast
TGME49_298990	T.gondii	ferredoxin NADP+ oxidoreductase, putative	ApiLoc: localizes to apicoplast
PF3D7_1232100	P.falciparum	chaperonin, cpn60	ApiLoc: localizes to apicoplast
TGME49_215070	T.gondii	ferredoxin	ApiLoc: localizes to apicoplast
PF3D7_1205700	P.falciparum	targeted glyoxalase II	ApiLoc: localizes to apicoplast
TGME49_226400	T.gondii	lipoic acid synthase	ApiLoc: localizes to apicoplast
PF3D7_0409400	P.falciparum	heat shock protein 40	ApiLoc: localizes to apicoplast
TGME49_206610	T.gondii	biotin requiring domain-containing protein / 2-oxo acid dehydrogenases acyltransferase catalytic domain-containing protein	ApiLoc: localizes to apicoplast
PF3D7_1344600	P.falciparum	lipoate synthase, putative	ApiLoc: localizes to apicoplast
PY03846	P.yoelii	enoyl-acyl carrier reductase	ApiLoc: localizes to apicoplast
PF3D7_0529300	P.falciparum	apicoplast TIC22 precursor	ApiLoc: localizes to apicoplast
PF3D7_0314200	P.falciparum	DER1-like protein, putative	ApiLoc: localizes to apicoplast
PF3D7_1406600	P.falciparum	ATP-dependent Clp protease, putative	ApiLoc: localizes to apicoplast
TGME49_285700	T.gondii	hypothetical protein	ApiLoc: localizes to apicoplast
PF3D7_0711000	P.falciparum	AAA family ATPase, CDC48 subfamily	ApiLoc: localizes to apicoplast
TGME49_251930	T.gondii	enoyl-acyl carrier reductase	ApiLoc: localizes to apicoplast
PF3D7_0307400	P.falciparum	ATP-dependent Clp protease proteolytic subunit	ApiLoc: localizes to apicoplast
TGME49_272290	T.gondii	pyruvate dehydrogenase E1 beta subunit, putative	ApiLoc: localizes to apicoplast
PF3D7_0211400	P.falciparum	beta-ketoacyl-ACP synthase III	ApiLoc: localizes to apicoplast
ETH_00000185	E.tenella	gi|50295339|gb|AY566297.1| Eimeria tenella enoyl-acyl carrier reductase (ENR) mRNA, complete cds	ApiLoc: localizes to apicoplast
TGME49_214850	T.gondii	1-deoxy-D-xylulose 5-phosphate reductoisomerase, putative	ApiLoc: localizes to apicoplast
PF3D7_0503100	P.falciparum	4-diphosphocytidyl-2c-methyl-D-erythritol kinase (CMK), putative	ApiLoc: localizes to apicoplast
TGME49_255370	T.gondii	hypothetical protein	ApiLoc: localizes to apicoplast
PF3D7_1239500	P.falciparum	DNA gyrase subunit B	ApiLoc: localizes to apicoplast
PF3D7_0530200	P.falciparum	triose phosphate transporter	ApiLoc: localizes to apicoplast
TGME49_266760	T.gondii	isocitrate dehydrogenase, putative	ApiLoc: localizes to apicoplast
PF3D7_0815700	P.falciparum	ubiquitin	ApiLoc: localizes to apicoplast
PF3D7_0623500	P.falciparum	superoxide dismutase	ApiLoc: localizes to apicoplast
PF3D7_0904700	P.falciparum	bacterial histone-like protein	ApiLoc: localizes to apicoplast
PF3D7_1452300	P.falciparum	DER1-like protein	ApiLoc: localizes to apicoplast
PF3D7_0816600	P.falciparum	ClpB protein, putative	ApiLoc: localizes to apicoplast
PF3D7_0607300	P.falciparum	uroporphyrinogen III decarboxylase	ApiLoc: localizes to apicoplast
TGME49_209710	T.gondii	50S ribosomal protein L28, putative	ApiLoc: localizes to apicoplast
PF3D7_0508300	P.falciparum	triose phosphate transporter	ApiLoc: localizes to apicoplast
PF3D7_0615100	P.falciparum	enoyl-acyl carrier reductase	ApiLoc: localizes to apicoplast
TGME49_233500	T.gondii	triosephosphate isomerase, putative	ApiLoc: localizes to apicoplast
TGME49_299810	T.gondii	cysteinyl-tRNA synthetase, putative	ApiLoc: localizes to apicoplast,cytoplasm
PF3D7_1235600	P.falciparum	serine hydroxymethyltransferase	ApiLoc: localizes to apicoplast,cytoplasm,mitochondrion
TGME49_266120	T.gondii	glutathione/thioredoxin peroxidase, putative	ApiLoc: localizes to apicoplast,cytoplasm,mitochondrion
PF3D7_1360800	P.falciparum	falcilysin	ApiLoc: localizes to apicoplast,food vacuole
TGME49_226730	T.gondii	aconitate hydratase, putative	ApiLoc: localizes to apicoplast,mitochondrion
PF3D7_0923600	P.falciparum	lipoate protein ligase a type 2	ApiLoc: localizes to apicoplast,mitochondrion
TGME49_267800	T.gondii	dynamin-like protein, putative	ApiLoc: localizes to apicoplast,mitochondrion
TGME49_316330	T.gondii	iron-containing superoxide dismutase	ApiLoc: localizes to apicoplast,mitochondrion
BBOV_I004020	B.bovis	acyl carrier protein	Literature: Confirmed localization to Apicoplast (Caballero et. al., 2012)
BBOV_III001660	B.bovis	LytB protein, putative	Literature: Confirmed localization to Apicoplast (Caballero et. al., 2012)
BBOV_III005960	B.bovis	tRNA methyl transferase family protein	Literature: Confirmed localization to Apicoplast (Sabine et. al, 2010)
TGME49_225990	T.gondii	malonyl CoA-acyl carrier protein transacylase, putative	Literature: Confirmed localization to Apicoplast (Sheiner et. al., 2011)
TGME49_227970	T.gondii	DNA-binding protein HU, putative	Literature: Confirmed localization to Apicoplast (Sheiner et. al., 2011)
TGME49_314890	T.gondii	ubiquitin-activating enzyme E1, putative	Literature: Confirmed localization to Apicoplast (Sheiner et. al., 2011)
TGME49_271420	T.gondii	porphobilinogen deaminase, putative	Literature: Confirmed localization to Apicoplast (Sheiner et. al., 2011)
TGME49_291670	T.gondii	RNA helicase, putative	Literature: Confirmed localization to Apicoplast (Sheiner et. al., 2011)
TGME49_202440	T.gondii	hypothetical protein	Literature: Confirmed localization to Apicoplast (Sheiner et. al., 2011)
TGME49_310770	T.gondii	hypothetical protein, conserved	Literature: Confirmed localization to Apicoplast (Sheiner et. al., 2011)
TGME49_293590	T.gondii	3-oxoacyl-[acyl-carrier-protein] synthase, putative	Literature: Confirmed localization to Apicoplast (Sheiner et. al., 2011)
TGME49_272390	T.gondii	hypothetical protein	Literature: Confirmed localization to Apicoplast (Sheiner et. al., 2011)
TGME49_286050	T.gondii	hypothetical protein	Literature: Confirmed localization to Apicoplast (Sheiner et. al., 2011)
TGME49_217740	T.gondii	oxoacyl-ACP reductase, putative	Literature: Confirmed localization to Apicoplast (Sheiner et. al., 2011)
TGME49_253900	T.gondii	delta-aminolevulinic acid dehydratase, putative	Literature: Confirmed localization to Apicoplast (Sheiner et. al., 2011)
TGME49_259230	T.gondii	hypothetical protein	Literature: Confirmed localization to Apicoplast (Sheiner et. al., 2011)
TGME49_240600	T.gondii	TCP-1/cpn60 chaperonin family protein, putative	Literature: Confirmed localization to Apicoplast (Sheiner et. al., 2011)
BBOV_IV010640	B.bovis	glutamyl-tRNA synthetase, putative	Literature: Confirmed localization to Apicoplast (personal communication with Lau A.O.)

## Sheet: Negative Seed Training Set
Identification	Organism	Description	Reference
PBANKA_081990	P.berghei	nucleosome assembly protein	ApiLoc: localizes to nucleus
NCLIV_033690	N.caninum	hypothetical protein	ApiLoc: localizes to apical
TGME49_223920	T.gondii	hypothetical protein	ApiLoc: localizes to apical
TGME49_280680	T.gondii	hypothetical protein	ApiLoc: localizes to nucleus
PKH_146980	P.knowlesi	reticulocyte binding protein, putative (fragment)	ApiLoc: localizes to apical
ETH_00010835	E.tenella	gi|38602660|emb|AJ586531.2| Eimeria tenella mRNA for surface antigen 1 (sag1 gene)	ApiLoc: localizes to parasite plasma membrane
PF3D7_0628200	P.falciparum	protein kinase PK4	ApiLoc: localizes to apical
PF3D7_1031000	P.falciparum	25 kDa ookinete surface antigen precursor	ApiLoc: localizes to parasite plasma membrane
PF3D7_0717300	P.falciparum	transcription initiation factor IIE, alpha subunit, putative	ApiLoc: localizes to nucleus
PF3D7_1343000	P.falciparum	phosphoethanolamine N-methyltransferase	ApiLoc: localizes to golgi apparatus
PY04499	P.yoelii	hypothetical protein	ApiLoc: localizes to parasitophorous vacuole
PKH_041300	P.knowlesi	merozoite surface protein, putative	ApiLoc: localizes to parasite plasma membrane
PKH_146970	P.knowlesi	reticulocyte binding protein, putative (fragment)	ApiLoc: localizes to apical
cgd7_1730	C.parvum	CpCCp1/Cpa135	ApiLoc: localizes to apical,parasitophorous vacuole
TGME49_305160	T.gondii	histone H2B, putative	ApiLoc: localizes to nucleus
PF3D7_1230700	P.falciparum	protein transport protein Sec13, putative	ApiLoc: localizes to endoplasmic reticulum
NCLIV_028680	N.caninum	apical membrane antigen 1, putative	ApiLoc: localizes to apical
BBOV_IV011230	B.bovis	apical membrane antigen 1	ApiLoc: localizes to apical
TGME49_315560	T.gondii	ABC transporter, putative	ApiLoc: localizes to golgi apparatus,parasite plasma membrane
TGME49_207900	T.gondii	transcription factor IIIB subunit, putative	ApiLoc: localizes to nucleus
PF3D7_0903800	P.falciparum	LCCL domain-containing protein	ApiLoc: localizes to parasite plasma membrane
PF3D7_1027700.1	P.falciparum	centrin-3	ApiLoc: localizes to nucleus
TGME49_261240	T.gondii	histone H3	ApiLoc: localizes to nucleus
PF3D7_1001500	P.falciparum	early transcribed membrane protein 10.1	ApiLoc: localizes to parasitophorous vacuole
TGME49_309410	T.gondii	hypothetical protein	ApiLoc: localizes to nucleus
TGME49_243440	T.gondii	histone acetyltransferase GCN5, putative	ApiLoc: localizes to nucleus
TGME49_271050	T.gondii	SRS34A (= SAG2A, P22)	ApiLoc: localizes to parasite plasma membrane
PBANKA_100620	P.berghei	sporozoite invasion-associated protein 1	ApiLoc: localizes to apical,parasite plasma membrane
PF3D7_0414900	P.falciparum	conserved ARM repeats protein, unknown function	ApiLoc: localizes to apical
TP03_0882	T.parva	hypothetical protein	ApiLoc: localizes to nucleus
TGME49_268590	T.gondii	rhomboid-like protease 4	ApiLoc: localizes to parasite plasma membrane
PF3D7_0207000	P.falciparum	merozoite surface protein 4	ApiLoc: localizes to parasite plasma membrane
TGME49_289600	T.gondii	Hsp20/alpha crystallin domain-containing protein	ApiLoc: localizes to parasite plasma membrane
PF3D7_1355300	P.falciparum	histone-lysine N-methyltransferase, putative	ApiLoc: localizes to nucleus
PF3D7_0917900	P.falciparum	heat shock protein 70	ApiLoc: localizes to endoplasmic reticulum,not apicoplast
PF3D7_0206800	P.falciparum	merozoite surface protein 2	ApiLoc: localizes to apical
TA03135	T.annulata	Tash(AT)-like protein, putative	ApiLoc: localizes to nucleus
TGME49_315490	T.gondii	hypothetical protein	ApiLoc: localizes to apical
TGME49_311670	T.gondii	hypothetical protein	ApiLoc: localizes to parasite plasma membrane
PY00204	P.yoelii	hypothetical protein	ApiLoc: localizes to apical
TGME49_286150	T.gondii	PAN domain-containing protein	ApiLoc: localizes to apical
TGME49_267810	T.gondii	Rab 5	ApiLoc: localizes to golgi apparatus
TGME49_254720	T.gondii	dense granule protein GRA8	ApiLoc: localizes to apical
TGME49_289770	T.gondii	mu1 adaptin	ApiLoc: localizes to apical,golgi apparatus
PF3D7_0501600	P.falciparum	rhoptry-associated protein 2	ApiLoc: localizes to apical
TGME49_250710	T.gondii	microneme protein 10	ApiLoc: localizes to apical
TGME49_275440	T.gondii	granule antigen protein GRA6	ApiLoc: localizes to parasite plasma membrane
PF3D7_1471200	P.falciparum	inorganic anion exchanger, inorganic anion antiporter	ApiLoc: localizes to parasite plasma membrane
PBANKA_121810	P.berghei	oocyst capsule protein	ApiLoc: localizes to parasite plasma membrane
TGME49_310460	T.gondii	RAB6 protein	ApiLoc: localizes to golgi apparatus,not apicoplast
TGME49_272500	T.gondii	sugar transporter, putative	ApiLoc: localizes to parasite plasma membrane
PF3D7_0717500	P.falciparum	calcium dependent protein kinase 4	ApiLoc: localizes to parasite plasma membrane
PF3D7_1451600	P.falciparum	LCCL-like protein	ApiLoc: localizes to parasite plasma membrane
TGME49_315220	T.gondii	rhoptry protein, putative	ApiLoc: localizes to apical
PF3D7_0612700	P.falciparum	6-cysteine protein	ApiLoc: localizes to parasite plasma membrane
PVX_003775	P.vivax	merozoite surface protein 4, putative	ApiLoc: localizes to parasite plasma membrane
TGME49_251540	T.gondii	GRA9 protein, putative	ApiLoc: localizes to apical,parasitophorous vacuole
PVX_003770	P.vivax	merozoite surface protein 5	ApiLoc: localizes to apical
PF3D7_0617900	P.falciparum	histone H3 variant, putative	ApiLoc: localizes to nucleus
PF3D7_0308300	P.falciparum	conserved Plasmodium protein, unknown function	ApiLoc: localizes to apical
PBANKA_110140	P.berghei	rhoptry-associated protein 2/3	ApiLoc: localizes to apical
TGME49_240460	T.gondii	malaria antigen, putative	ApiLoc: localizes to nucleus
PF3D7_0910000	P.falciparum	SET domain protein, putative	ApiLoc: localizes to nucleus
PF3D7_1243400	P.falciparum	conserved Plasmodium protein, unknown function	ApiLoc: localizes to apical
PBANKA_145930	P.berghei	actin, putative	ApiLoc: localizes to apical
TGME49_248670	T.gondii	H+-translocating inorganic pyrophosphatase TVP, putative	ApiLoc: localizes to parasite plasma membrane
PF3D7_1027300	P.falciparum	merozoite capping protein 1	ApiLoc: localizes to nucleus
PF3D7_0610400	P.falciparum	histone H3	ApiLoc: localizes to nucleus
TGME49_276140	T.gondii	ADP ribosylation factor 1	ApiLoc: localizes to golgi apparatus
PF3D7_1473700	P.falciparum	conserved Plasmodium protein, unknown function	ApiLoc: localizes to nucleus
PBANKA_103820	P.berghei	nuclear formin-like protein	ApiLoc: localizes to nucleus
TGME49_242720	T.gondii	hypothetical protein	ApiLoc: localizes to golgi apparatus
PF3D7_1407100	P.falciparum	fibrillarin, putative	ApiLoc: localizes to nucleus
TGME49_225410	T.gondii	histone H3 variant, putative	ApiLoc: localizes to nucleus
cgd6_780	C.parvum	CpTSP8,predicted extracellular protein with 3 TSP1 repeats, an EGF domain and a C-terminal transmembrane domain. adjacent TSP domain containing gene.	ApiLoc: localizes to apical,parasite plasma membrane
PF3D7_1032400	P.falciparum	N-acetylglucosaminyl-phosphatidylinositol biosynthetic protein, putative	ApiLoc: localizes to endoplasmic reticulum
PBANKA_103780	P.berghei	secreted ookinete adhesive protein	ApiLoc: localizes to apical
PF3D7_0827800	P.falciparum	SET domain protein, putative	ApiLoc: localizes to nucleus
PF3D7_1315800	P.falciparum	Myb1-related transcription factor	ApiLoc: localizes to nucleus
PBANKA_141030	P.berghei	M1-family aminopeptidase, putative	ApiLoc: localizes to apical
PF3D7_1206000	P.falciparum	protein phosphatase, putative	ApiLoc: localizes to apical
TGME49_206510	T.gondii	peptidase M16 domain containing protein	ApiLoc: localizes to apical
PF3D7_0925700	P.falciparum	histone deacetylase	ApiLoc: localizes to nucleus
PBANKA_081890	P.berghei	heat shock protein 70, putative	ApiLoc: localizes to endoplasmic reticulum,nucleus
PBANKA_082420	P.berghei	perforin like protein 3	ApiLoc: localizes to apical
PVX_000995	P.vivax	transmission-blocking target antigen Pfs230, putative	ApiLoc: localizes to parasite plasma membrane
PF3D7_1035400	P.falciparum	merozoite surface protein 3	ApiLoc: localizes to apical,parasite plasma membrane
TGME49_260310	T.gondii	ATP-binding cassette protein subfamily B member 1	ApiLoc: localizes to parasite plasma membrane
TA17315	T.annulata	surface protein precursor (TaSP), putative	ApiLoc: localizes to parasite plasma membrane
ETH_00010780	E.tenella	gi|37699771|emb|AJ586535.1| Eimeria tenella mRNA for surface antigen 4 (sag4 gene)	ApiLoc: localizes to parasite plasma membrane
cgd1_3500	C.parvum	thrombospondin related adhesive protein	ApiLoc: localizes to apical
PF3D7_1471100	P.falciparum	exported protein 2	ApiLoc: localizes to parasitophorous vacuole
PF3D7_0604100	P.falciparum	transcription factor with AP2 domain(s), putative,SPE2-interacting protein	ApiLoc: localizes to nucleus
PF3D7_0824400	P.falciparum	nucleoside transporter 2	ApiLoc: localizes to endoplasmic reticulum
PBANKA_143230	P.berghei	cell traversal protein for ookinetes and sporozoites	ApiLoc: localizes to apical
PF3D7_0506200	P.falciparum	transcription initiation factor TFiid, TATA-binding protein	ApiLoc: localizes to nucleus
PF3D7_0402200	P.falciparum	surface-associated interspersed gene 4.1, (SURFIN4.1)	ApiLoc: localizes to parasitophorous vacuole
TGME49_319560	T.gondii	microneme protein MIC3	ApiLoc: localizes to parasite plasma membrane
TGME49_239260	T.gondii	histone H4, putative	ApiLoc: localizes to nucleus
PF3D7_1321900	P.falciparum	conserved Plasmodium protein, unknown function	ApiLoc: localizes to apical
PF3D7_1417800	P.falciparum	minchromosome maintenance (MCM) complex subunit	ApiLoc: localizes to nucleus
PF3D7_1420700	P.falciparum	surface protein, Pf113	ApiLoc: localizes to apical,parasite plasma membrane
PF3D7_1212500	P.falciparum	glycerol-3-phosphate acyltransferase	ApiLoc: localizes to endoplasmic reticulum
TGME49_205580	T.gondii	hypothetical protein	ApiLoc: localizes to nucleus
PBANKA_092670	P.berghei	circumsporozoite-related antigen	ApiLoc: localizes to parasite plasma membrane,parasitophorous vacuole
PVX_090935	P.vivax	histone 2B	ApiLoc: localizes to nucleus
PF3D7_1203700	P.falciparum	nucleosome assembly protein	ApiLoc: localizes to nucleus
PF3D7_0404700	P.falciparum	dipeptidyl peptidase 3	ApiLoc: localizes to apical
PY06644	P.yoelii	enolase	ApiLoc: localizes to nucleus,parasite plasma membrane
TGME49_312100	T.gondii	Ca2+-ATPase	ApiLoc: localizes to parasite plasma membrane
TGME49_243730	T.gondii	p36 protein	ApiLoc: localizes to apical
TGME49_293900	T.gondii	hypothetical protein	ApiLoc: localizes to apical
PF3D7_1320600	P.falciparum	Rab GTPase 11a	ApiLoc: localizes to apical,parasite plasma membrane
TGME49_202810	T.gondii	DnaJ domain-containing protein	ApiLoc: localizes to endoplasmic reticulum
PF3D7_0415300	P.falciparum	cdc2-related protein kinase 3	ApiLoc: localizes to nucleus
TGME49_239740	T.gondii	hypothetical protein	ApiLoc: localizes to apical,parasitophorous vacuole
PF3D7_1340900	P.falciparum	sodium-dependent phosphate transporter	ApiLoc: localizes to parasite plasma membrane
PVX_085930	P.vivax	rhoptry-associated protein 1, putative	ApiLoc: localizes to apical
TGME49_294270	T.gondii	arginine methyltransferase protein, putative	ApiLoc: localizes to nucleus
PBANKA_070280	P.berghei	protein disulfide isomerase	ApiLoc: localizes to apical
PKH_062300	P.knowlesi	erythrocyte binding protein (alpha)	ApiLoc: localizes to apical
PF3D7_0624600	P.falciparum	SNF2 helicase, putative	ApiLoc: localizes to nucleus
PBANKA_093350	P.berghei	rhomboid 1	ApiLoc: localizes to apical,parasite plasma membrane
PF3D7_0109100	P.falciparum	LCCL domain-containing protein	ApiLoc: localizes to parasite plasma membrane
PF3D7_1136900	P.falciparum	subtilisin-like protease 2	ApiLoc: localizes to apical
PF3D7_1141800	P.falciparum	conserved Plasmodium protein, unknown function	ApiLoc: localizes to nucleus
PF3D7_1235200	P.falciparum	V-type K -independent H -translocating inorganic pyrophosphatase	ApiLoc: localizes to parasite plasma membrane
PF3D7_0416800	P.falciparum	small GTP-binding protein sar1	ApiLoc: localizes to endoplasmic reticulum
TGME49_203310	T.gondii	dense granule protein 7	ApiLoc: localizes to apical
TGME49_245490	T.gondii	microneme protein 8	ApiLoc: localizes to apical
PKH_041310	P.knowlesi	merozoite surface protein 5	ApiLoc: localizes to apical
PBANKA_052480	P.berghei	early transcribed membrane protein	ApiLoc: localizes to parasite plasma membrane,parasitophorous vacuole
PF3D7_0823300	P.falciparum	histone acetyltransferase GCN5	ApiLoc: localizes to nucleus
PF3D7_1443000	P.falciparum	serine/threonine protein kinase, putative	ApiLoc: localizes to nucleus
NCLIV_030050	N.caninum	hypothetical protein, conserved	ApiLoc: localizes to apical
PF3D7_0207700	P.falciparum	serine repeat antigen 4	ApiLoc: localizes to parasitophorous vacuole
PF3D7_0507200	P.falciparum	subtilisin-like protease 3, putative	ApiLoc: localizes to parasitophorous vacuole
PF3D7_1116400	P.falciparum	ER membrane protein Sec12	ApiLoc: localizes to endoplasmic reticulum
TGME49_227810	T.gondii	Rhoptry kinase family protein ROP11 (incomplete catalytic triad)	ApiLoc: localizes to apical
PF3D7_0418500	P.falciparum	Bet3 transport protein, putative	ApiLoc: localizes to endoplasmic reticulum
TGME49_261250	T.gondii	histone H2A, putative	ApiLoc: localizes to nucleus
PF3D7_0303400	P.falciparum	palmitoyl transferase	ApiLoc: localizes to golgi apparatus
TGME49_213900	T.gondii	regulator of chromosome condensation, putative	ApiLoc: localizes to nucleus
TGME49_277240	T.gondii	nucleoside-triphosphatase I	ApiLoc: localizes to parasite plasma membrane,parasitophorous vacuole
cgd7_4020	C.parvum	cryptopsoridial mucin, large thr stretch, signal peptide sequence	ApiLoc: localizes to apical,parasite plasma membrane
TGME49_268900	T.gondii	dense granular protein GRA10	ApiLoc: localizes to apical,parasitophorous vacuole
NCLIV_021640	N.caninum	dense granule protein 7, putative	ApiLoc: localizes to apical,parasite plasma membrane
TGME49_305180	T.gondii	sodium/hydrogen exchanger, putative	ApiLoc: localizes to not apicoplast
PF3D7_0423700	P.falciparum	early transcribed membrane protein 4	ApiLoc: localizes to parasitophorous vacuole
TGME49_243930	T.gondii	hypothetical protein	ApiLoc: localizes to apical
NCLIV_021050	N.caninum	hypothetical protein	ApiLoc: localizes to apical
NCLIV_038110	N.caninum	hypothetical protein	ApiLoc: localizes to apical
TGME49_314250	T.gondii	hypothetical protein	ApiLoc: localizes to apical
PF3D7_0414600	P.falciparum	conserved protein, unknown function	ApiLoc: localizes to apical
TGME49_200250	T.gondii	PAN domain-containing protein	ApiLoc: localizes to apical
TGME49_218260	T.gondii	histone H3.3 variant	ApiLoc: localizes to nucleus
PF3D7_1317100	P.falciparum	minchromosome maintenance (MCM) complex subunit, putative	ApiLoc: localizes to nucleus
PF3D7_0324900	P.falciparum	erythrocyte membrane protein 1, PfEMP1	ApiLoc: localizes to nucleus
TGME49_246550	T.gondii	eukaryotic aspartyl protease, putative	ApiLoc: localizes to golgi apparatus
PY02159	P.yoelii	Drosophila melanogaster CG15040 gene product	ApiLoc: localizes to apical
TGME49_295110	T.gondii	Rhoptry kinase family protein ROP4 / ROP7 (incomplete catalytic triad) ***WARNING: GENE MODEL INACCURATE ***	ApiLoc: localizes to apical,parasitophorous vacuole
PF3D7_1364100	P.falciparum	cysteine-rich surface protein	ApiLoc: localizes to apical,parasite plasma membrane
PF3D7_0404900	P.falciparum	6-cysteine protein	ApiLoc: localizes to apical,parasite plasma membrane
TA06510	T.annulata	hypothetical protein	ApiLoc: localizes to parasite plasma membrane
PF3D7_1459900	P.falciparum	conserved Plasmodium membrane protein, unknown function	ApiLoc: localizes to apical
PCHAS_103520	P.gallinaceum	Nothing has been found	ApiLoc: localizes to apical,parasite plasma membrane
PF3D7_1346700	P.falciparum	6-cysteine protein	ApiLoc: localizes to parasite plasma membrane
PF3D7_0210700	P.falciparum	syntaxin, Qa-SNARE family	ApiLoc: localizes to parasite plasma membrane
PBANKA_090590	P.berghei	transcription factor with AP2 domain(s), putative	ApiLoc: localizes to nucleus
PF3D7_1409900	P.falciparum	cytidine diphosphate-diacylglycerol synthase	ApiLoc: localizes to parasitophorous vacuole
TGME49_263290	T.gondii	rhomboid-like protease TgROM2	ApiLoc: localizes to golgi apparatus,parasite plasma membrane
TGME49_252880	T.gondii	hypothetical protein	ApiLoc: localizes to apical
PF3D7_1361900	P.falciparum	proliferating cell nuclear antigen	ApiLoc: localizes to nucleus
BBOV_I003000	B.bovis	merozoite surface antigen-2a2 (MSA-2a2)	ApiLoc: localizes to parasite plasma membrane
PY03052	P.yoelii	sporozoite surface protein 2 precursor	ApiLoc: localizes to apical,parasite plasma membrane
TGME49_218362	T.gondii	zinc finger (CCCH type) protein, putative	ApiLoc: localizes to nucleus
PVX_090930	P.vivax	histone H4, putative	ApiLoc: localizes to nucleus
TGME49_286450	T.gondii	dense granule protein 5 precursor	ApiLoc: localizes to apical
PY06415	P.yoelii	merozoite surface protein precursor	ApiLoc: localizes to apical,parasite plasma membrane
PVX_090075	P.vivax	hypothetical protein, conserved	ApiLoc: localizes to apical
TGME49_215980	T.gondii	hypothetical protein	ApiLoc: localizes to apical,parasitophorous vacuole
TGME49_214320	T.gondii	facilitative glucose transporter, putative	ApiLoc: localizes to parasite plasma membrane
TGME49_252640	T.gondii	plasma-membrane H+-ATPase, putative	ApiLoc: localizes to parasite plasma membrane
PY07092	P.yoelii	hypothetical protein	ApiLoc: localizes to apical
PF3D7_0503600	P.falciparum	myosin B	ApiLoc: localizes to apical
TGME49_204340	T.gondii	hypothetical protein	ApiLoc: localizes to apical
BBOV_I002990	B.bovis	merozoite surface antigen-2b (MSA-2b)	ApiLoc: localizes to parasite plasma membrane
PY05977	P.yoelii	erythrocyte binding protein	ApiLoc: localizes to apical
PF3D7_1023000	P.falciparum	conserved Plasmodium membrane protein, unknown function	ApiLoc: localizes to apical
PF3D7_0830700	P.falciparum	Plasmodium exported protein (hyp9), unknown function	ApiLoc: localizes to parasite plasma membrane
PF3D7_0511200	P.falciparum	stearoyl-CoA delta 9 desaturase, putative	ApiLoc: localizes to endoplasmic reticulum
PF3D7_1318000	P.falciparum	conserved Plasmodium membrane protein, unknown function	ApiLoc: localizes to apical
PF3D7_1332000	P.falciparum	syntaxin, Qa-SNARE family	ApiLoc: localizes to endoplasmic reticulum,golgi apparatus
NCLIV_000610	N.caninum	profilin family protein, putative	ApiLoc: localizes to apical
PF3D7_0212100	P.falciparum	conserved Plasmodium protein, unknown function	ApiLoc: localizes to nucleus
PVX_092275	P.vivax	apical merozoite antigen 1	ApiLoc: localizes to apical
PF3D7_1253200	P.falciparum	Plasmodium exported protein, unknown function	ApiLoc: localizes to nucleus
TGME49_227280	T.gondii	dense granule protein 3	ApiLoc: localizes to apical
TGME49_261780	T.gondii	microneme protein 7	ApiLoc: localizes to apical
TGME49_247460	T.gondii	proliferating cell nuclear antigen 1	ApiLoc: localizes to nucleus
TGME49_311720	T.gondii	heat shock protein 70, putative	ApiLoc: localizes to endoplasmic reticulum,nucleus
PBANKA_135570	P.berghei	myosin A	ApiLoc: localizes to apical
PF3D7_0423800	P.falciparum	conserved Plasmodium protein, unknown function	ApiLoc: localizes to apical
PF3D7_1229100	P.falciparum	ABC transporter, (CT family)	ApiLoc: localizes to parasite plasma membrane
PF3D7_0620400	P.falciparum	merozoite surface protein 10	ApiLoc: localizes to apical,parasite plasma membrane
TGME49_263710	T.gondii	sterol O-acyltransferase, putative	ApiLoc: localizes to endoplasmic reticulum
TGME49_269190	T.gondii	glyceraldehyde-3-phosphate dehydrogenase	ApiLoc: localizes to endoplasmic reticulum
PF3D7_0215800	P.falciparum	origin recognition complex subunit 5	ApiLoc: localizes to nucleus
ETH_00026625	E.tenella	gi|156257451|gb|EU093966.1| Eimeria tenella microneme 1 precursor, mRNA, partial cds	ApiLoc: localizes to apical
NCLIV_056880	N.caninum	hypothetical protein, conserved	ApiLoc: localizes to apical,parasitophorous vacuole
cgd4_2720	C.parvum	P-type ATpase involved in cation transport	ApiLoc: localizes to apical,nucleus
TGME49_259530	T.gondii	UDP-N-acetyl-D-galactosamine:polypeptide N-acetylgalactosaminyltransferase T1, putative	ApiLoc: localizes to golgi apparatus
PF3D7_1347200	P.falciparum	nucleoside transporter 1	ApiLoc: localizes to parasite plasma membrane
cgd4_2330	C.parvum	hypothetical protein	ApiLoc: localizes to apical,parasite plasma membrane
TGME49_300200	T.gondii	histone H2A	ApiLoc: localizes to nucleus
PBANKA_040320	P.berghei	circumsporozoite (CS) protein	ApiLoc: localizes to apical,nucleus,parasite plasma membrane
TGME49_211290	T.gondii	hypothetical protein	ApiLoc: localizes to apical
PF3D7_1035700	P.falciparum	duffy binding-like merozoite surface protein	ApiLoc: localizes to parasite plasma membrane
TGME49_232940	T.gondii	small heat shock protein 20	ApiLoc: localizes to apical,parasite plasma membrane
TGME49_227620	T.gondii	28 kDa antigen	ApiLoc: localizes to apical
NCLIV_036400	N.caninum	dense granule protein 1 / major antigenp24, putative	ApiLoc: localizes to apical,parasite plasma membrane
TGME49_308090	T.gondii	Rhoptry kinase family protein ROP5 (incomplete catalytic triad)	ApiLoc: localizes to apical
TGME49_218520	T.gondii	microneme protein MIC6	ApiLoc: localizes to apical
TA06730	T.annulata	cdc2-like kinase	ApiLoc: localizes to nucleus
TGME49_232400	T.gondii	PAN domain-containing protein	ApiLoc: localizes to parasitophorous vacuole
TGME49_236650	T.gondii	DEAD/DEAH box helicase, putative	ApiLoc: localizes to nucleus
TGME49_294290	T.gondii	der1-like family domain-containing protein, conserved	ApiLoc: localizes to endoplasmic reticulum
ETH_00024910	E.tenella	gi|13774514|gb|AF353515.1| Eimeria tenella enolase mRNA, complete cds	ApiLoc: localizes to apical,nucleus
ETH_00021010	E.tenella	gi|40549146|gb|AY512381.1|AY512381S1 Eimeria tenella microneme protein MIC3 gene, partial cds	ApiLoc: localizes to apical
PF3D7_1116800	P.falciparum	heat shock protein 101	ApiLoc: localizes to parasitophorous vacuole
NCLIV_022970	N.caninum	microneme protein 2, putative	ApiLoc: localizes to apical
PY04421	P.yoelii	U43539 hepatocyte erythrocyte protein 17 kDa	ApiLoc: localizes to parasitophorous vacuole
TGME49_261580	T.gondii	histone H2A, putative	ApiLoc: localizes to nucleus
PF3D7_1016000	P.falciparum	conserved Plasmodium protein, unknown function	ApiLoc: localizes to apical
PBANKA_144400	P.berghei	macrophage migration inhibitory factor	ApiLoc: localizes to parasitophorous vacuole
TGME49_207130	T.gondii	SRS49A (= SAG2Y)	ApiLoc: localizes to parasite plasma membrane
PF3D7_0506900	P.falciparum	rhomboid protease ROM4	ApiLoc: localizes to parasite plasma membrane
TGME49_286790	T.gondii	pinin/SDK/memA/ domain-containing protein	ApiLoc: localizes to nucleus
PY05748	P.yoelii	merozoite surface protein 1 precursor	ApiLoc: localizes to parasite plasma membrane
TGME49_203990	T.gondii	hypothetical protein, conserved	ApiLoc: localizes to apical
PF3D7_0508500	P.falciparum	guanidine nucleotide exchange factor	ApiLoc: localizes to nucleus
PY01365	P.yoelii	rhoptry protein	ApiLoc: localizes to apical
TGME49_249670	T.gondii	cysteine proteinase, putative	ApiLoc: localizes to apical,parasitophorous vacuole
NCLIV_045650	N.caninum	28 kDa antigen, putative	ApiLoc: localizes to apical,parasite plasma membrane
TGME49_280380	T.gondii	non-transmembrane antigen	ApiLoc: localizes to parasitophorous vacuole
cgd2_70	C.parvum	ABC transporter, with 12 x transmembrane domains and 2x AAA domains	ApiLoc: localizes to apical
PF3D7_1211600	P.falciparum	lysine-specific histone demethylase 1, putative	ApiLoc: localizes to nucleus
PF3D7_1104200	P.falciparum	chromatin remodeling protein	ApiLoc: localizes to nucleus
TGME49_309590	T.gondii	rhoptry protein, putative	ApiLoc: localizes to apical,parasitophorous vacuole
TGME49_289620	T.gondii	cathepsin C	ApiLoc: localizes to apical
PF3D7_0212600	P.falciparum	secreted protein altered thrombospondin repeat protein	ApiLoc: localizes to apical,parasite plasma membrane
PBANKA_141830	P.berghei	rhoptry protein 2, putative	ApiLoc: localizes to apical
PF3D7_1105000	P.falciparum	histone H4	ApiLoc: localizes to nucleus
ETH_00035000	E.tenella	gi|37699775|emb|AJ586537.1| Eimeria tenella mRNA for surface antigen 8 (sag8 gene)	ApiLoc: localizes to parasite plasma membrane
PF3D7_0207600	P.falciparum	serine repeat antigen 5	ApiLoc: localizes to parasitophorous vacuole
TGME49_248830	T.gondii	phospholipase C delta 1	ApiLoc: localizes to parasite plasma membrane
NCLIV_001970	N.caninum	hypothetical protein	ApiLoc: localizes to apical
TGME49_288680	T.gondii	endonuclease V, putative	ApiLoc: localizes to nucleus
TGME49_270250	T.gondii	dense granule protein 1 / major antigenp24	ApiLoc: localizes to apical
PF3D7_1031200	P.falciparum	MORN repeat protein, putative	ApiLoc: localizes to apical
TGME49_247540	T.gondii	ABC transporter, putative	ApiLoc: localizes to parasite plasma membrane,parasitophorous vacuole
PF3D7_1012200	P.falciparum	conserved Plasmodium protein, unknown function	ApiLoc: localizes to apical
PF3D7_1218000	P.falciparum	thrombospondin-related apical membrane protein	ApiLoc: localizes to parasite plasma membrane
PF3D7_0512300	P.falciparum	CDK-activating kinase assembly factor	ApiLoc: localizes to nucleus
BBOV_I003060	B.bovis	merozoite surface antigen-1 (MSA-1)	ApiLoc: localizes to parasite plasma membrane
TGME49_200290	T.gondii	rhomboid family domain-containing protein	ApiLoc: localizes to apical,endoplasmic reticulum,golgi apparatus
PVX_095475	P.vivax	CTRP adhesive protein (invasive stage), putative	ApiLoc: localizes to apical
PF3D7_1130200	P.falciparum	60S ribosomal protein P0	ApiLoc: localizes to parasite plasma membrane
PF3D7_1018300	P.falciparum	conserved Plasmodium protein, unknown function	ApiLoc: localizes to nucleus
PF3D7_0709000	P.falciparum	chloroquine resistance transporter	ApiLoc: localizes to endoplasmic reticulum
PF3D7_1036300	P.falciparum	merozoite surface protein	ApiLoc: localizes to apical
PF3D7_1220900	P.falciparum	heterochromatin protein 1	ApiLoc: localizes to nucleus
PBANKA_102460	P.berghei	liver specific protein 1	ApiLoc: localizes to parasitophorous vacuole
PF3D7_1017100	P.falciparum	conserved Plasmodium protein, unknown function	ApiLoc: localizes to apical
BBOV_I003010	B.bovis	merozoite surface antigen-2a1 (MSA-2a1)	ApiLoc: localizes to parasite plasma membrane
PF3D7_0513800	P.falciparum	Rab GTPase 1a	ApiLoc: localizes to endoplasmic reticulum
cgd6_1080	C.parvum	conserved hypothetical protein	ApiLoc: localizes to apical,parasite plasma membrane
PF3D7_1355100	P.falciparum	minchromosome maintenance (MCM) complex subunit	ApiLoc: localizes to nucleus
ETH_00011145	E.tenella	gi|2854032|gb|AF043910.1| Eimeria tenella pyruvate kinase (PYK) mRNA, complete cds	ApiLoc: localizes to apical
PF3D7_0508000	P.falciparum	6-cysteine protein	ApiLoc: localizes to apical
PF3D7_0210600	P.falciparum	conserved Plasmodium protein, unknown function	ApiLoc: localizes to apical
PF3D7_1141600	P.falciparum	dolichol phosphate mannose synthase	ApiLoc: localizes to endoplasmic reticulum
PF3D7_1410400	P.falciparum	rhoptry-associated protein 1	ApiLoc: localizes to parasitophorous vacuole
PF3D7_0507300	P.falciparum	conserved Plasmodium protein, unknown function	ApiLoc: localizes to nucleus,parasitophorous vacuole
TGME49_299060	T.gondii	sodium/hydrogen exchanger, putative	ApiLoc: localizes to apical
PY04764	P.yoelii	duffy receptor, beta form precursor	ApiLoc: localizes to apical
PF3D7_1014400	P.falciparum	MO15-related protein kinase	ApiLoc: localizes to nucleus
PF3D7_1322100	P.falciparum	SET domain protein, putative	ApiLoc: localizes to nucleus
TGME49_321530	T.gondii	cathepsin L-like thiolproteinase, putative	ApiLoc: localizes to apical
PF3D7_0929400	P.falciparum	high molecular weight rhoptry protein 2	ApiLoc: localizes to parasite plasma membrane
TGME49_229630	T.gondii	protein kinase (incomplete catalytic triad)	ApiLoc: localizes to endoplasmic reticulum,nucleus
PF3D7_0920700	P.falciparum	conserved Plasmodium protein, unknown function	ApiLoc: localizes to apical
PCHAS_000190	P.chabaudi	early transcribed membrane protein (ETRAMP)	ApiLoc: localizes to apical,parasitophorous vacuole
PF3D7_1023900	P.falciparum	chromodomain-helicase-DNA-binding protein 1 homolog, putative	ApiLoc: localizes to nucleus
PVX_110810	P.vivax	Duffy receptor precursor	ApiLoc: localizes to apical
PF3D7_0204700	P.falciparum	hexose transporter	ApiLoc: localizes to parasite plasma membrane
PBANKA_112700	P.berghei	ethanolaminephosphotransferase, putative	ApiLoc: localizes to endoplasmic reticulum
PF3D7_1221000	P.falciparum	conserved Plasmodium protein, unknown function	ApiLoc: localizes to nucleus
PF3D7_0209000	P.falciparum	6-cysteine protein	ApiLoc: localizes to parasite plasma membrane
PF3D7_1436300	P.falciparum	translocon component PTEX150	ApiLoc: localizes to parasitophorous vacuole
PF3D7_1346100	P.falciparum	Sec61 alpha subunit, PfSec61	ApiLoc: localizes to endoplasmic reticulum
TGME49_234380	T.gondii	hypothetical protein	ApiLoc: localizes to apical
PY00454	P.yoelii	MAC/Perforin domain, putative	ApiLoc: localizes to apical
NCLIV_052880	N.caninum	granule antigen protein GRA6, putative	ApiLoc: localizes to apical
PF3D7_1412000	P.falciparum	p1/s1 nuclease, putative	ApiLoc: localizes to apical
cgd6_4840	C.parvum	serine protease, subtilase family, signal peptide	ApiLoc: localizes to apical
PF3D7_0808200	P.falciparum	plasmepsin X	ApiLoc: localizes to apical
BBOV_II002650	B.bovis	thrombospondin-related anonymous protein	ApiLoc: localizes to apical
TP01_0939	T.parva	hypothetical protein	ApiLoc: localizes to parasite plasma membrane
TP04_0437	T.parva	104 kDa antigen	ApiLoc: localizes to apical
NCLIV_028990	N.caninum	hypothetical protein	ApiLoc: localizes to apical
PY03011	P.yoelii	early transcribed membrane protein family	ApiLoc: localizes to apical
TGME49_311430	T.gondii	fibrillarin, putative	ApiLoc: localizes to nucleus
BBOV_I003020	B.bovis	merozoite surface antigen-2c (MSA-2c)	ApiLoc: localizes to parasite plasma membrane
TGME49_209570	T.gondii	exonuclease domain-containing protein	ApiLoc: localizes to nucleus
PF3D7_1323500	P.falciparum	plasmepsin V	ApiLoc: localizes to endoplasmic reticulum
TGME49_204130	T.gondii	membrane-attack complex / perforin domain-containing protein	ApiLoc: localizes to apical
PF3D7_1214100	P.falciparum	phosphatidylinositol-glycan biosynthesis class O protein, putative	ApiLoc: localizes to endoplasmic reticulum
PBANKA_051490	P.berghei	28 kDa ookinete surface protein	ApiLoc: localizes to parasite plasma membrane
NCLIV_043270	N.caninum	microneme protein MIC1, putative	ApiLoc: localizes to apical
TGME49_309250	T.gondii	AT hook motif-containing protein	ApiLoc: localizes to nucleus
TGME49_200230	T.gondii	PAN domain-containing protein	ApiLoc: localizes to apical
PBANKA_090710	P.berghei	inner membrane complex protein 1b	ApiLoc: localizes to apical
PF3D7_1452000	P.falciparum	rhoptry neck protein 2	ApiLoc: localizes to apical
PF3D7_1364900	P.falciparum	ferrochelatase	ApiLoc: localizes to not apicoplast
TGME49_291890	T.gondii	microneme protein MIC1	ApiLoc: localizes to apical
PF3D7_0304600	P.falciparum	circumsporozoite (CS) protein	ApiLoc: localizes to parasite plasma membrane
TGME49_319530	T.gondii	splicing factor, putative	ApiLoc: localizes to not apicoplast
TGME49_300130	T.gondii	apical membrane antigen, putative	ApiLoc: localizes to apical
TGME49_259200	T.gondii	Na+/H+ antiporter, putative	ApiLoc: localizes to parasite plasma membrane
TGME49_276130	T.gondii	cathepsin C2 (TgCPC2)	ApiLoc: localizes to apical
TGME49_294690	T.gondii	rhomboid-like protease 5	ApiLoc: localizes to parasite plasma membrane
TGME49_289680	T.gondii	Ras family domain-containing protein	ApiLoc: localizes to apical
TP04_0051	T.parva	polymorphic immunodominant molecule	ApiLoc: localizes to parasite plasma membrane
PF3D7_1035600	P.falciparum	merozoite surface protein	ApiLoc: localizes to apical
PF3D7_0202500	P.falciparum	early transcribed membrane protein 2	ApiLoc: localizes to parasitophorous vacuole
PF3D7_1331300	P.falciparum	signal peptidase 21 kDa subunit	ApiLoc: localizes to endoplasmic reticulum
PF3D7_0707300	P.falciparum	rhoptry-associated membrane antigen	ApiLoc: localizes to endoplasmic reticulum,golgi apparatus
PF3D7_1035800	P.falciparum	probable protein, unknown function	ApiLoc: localizes to apical
PBANKA_131570	P.berghei	rhoptry neck protein 2	ApiLoc: localizes to apical
PF3D7_1202900	P.falciparum	high mobility group protein	ApiLoc: localizes to nucleus
TGME49_256000	T.gondii	endoplasmic reticulum retention receptor, putative	ApiLoc: localizes to apical
PY04986	P.yoelii	250-270 copies of a 13 AA repeat, NSSTPITSSSIL	ApiLoc: localizes to apical
PBANKA_143360	P.berghei	thrombospondin-related apical membrane protein	ApiLoc: localizes to parasite plasma membrane
PF3D7_1028700	P.falciparum	merozoite TRAP-like protein	ApiLoc: localizes to apical
PF3D7_0402300	P.falciparum	normocyte binding protein 1,reticulocyte binding protein homologue 1	ApiLoc: localizes to apical
PF3D7_0827900	P.falciparum	protein disulfide isomerase	ApiLoc: localizes to endoplasmic reticulum
BBOV_I004210	B.bovis	spherical body protein 3	ApiLoc: localizes to apical
PF3D7_0927900	P.falciparum	phosphatidylserine decarboxylase	ApiLoc: localizes to endoplasmic reticulum
TGME49_233460	T.gondii	SRS29B (= SAG1, P30)	ApiLoc: localizes to parasite plasma membrane
PF3D7_1369000	P.falciparum	glycosylphosphatidylinositol anchor attachment 1 protein, putative	ApiLoc: localizes to endoplasmic reticulum
TGME49_293770	T.gondii	chitinase class I, putative	ApiLoc: localizes to apical
TGME49_200240	T.gondii	PAN domain-containing protein	ApiLoc: localizes to apical
PF3D7_1035500	P.falciparum	merozoite surface protein 6	ApiLoc: localizes to apical,parasite plasma membrane
PF3D7_0220800	P.falciparum	cytoadherence linked asexual protein 2	ApiLoc: localizes to apical
TGME49_204530	T.gondii	microneme protein MIC11	ApiLoc: localizes to apical
PY04858	P.yoelii	ookinete protein-related	ApiLoc: localizes to apical
PF3D7_1361100	P.falciparum	Sec24 subunit a	ApiLoc: localizes to endoplasmic reticulum
PKH_040760	P.knowlesi	SPATR protein, putative	ApiLoc: localizes to parasite plasma membrane
PVX_123575	P.vivax	thrombospondin-related protein 3 precursor, putative	ApiLoc: localizes to apical
PF3D7_0702300	P.falciparum	sporozoite threonine and asparagine-rich protein	ApiLoc: localizes to parasite plasma membrane
TGME49_215775	T.gondii	Rhoptry kinase family protein ROP2A (incomplete catalytic triad)	ApiLoc: localizes to apical,parasitophorous vacuole;ApiLoc: localizes to apical
TGME49_201780	T.gondii	microneme protein 2	ApiLoc: localizes to apical,parasite plasma membrane
PF3D7_0323500	P.falciparum	survival of motor neuron (SMN)-like protein	ApiLoc: localizes to nucleus
TGME49_291930	T.gondii	nucleolar phosphoprotein nucleolin, putative	ApiLoc: localizes to nucleus
TGME49_259020	T.gondii	bradyzoite antigen, putative	ApiLoc: localizes to parasite plasma membrane
PF3D7_0722200	P.falciparum	rhoptry-associated leucine zipper-like protein 1	ApiLoc: localizes to apical
TGME49_205250	T.gondii	Rhoptry kinase family protein ROP18	ApiLoc: localizes to apical,parasitophorous vacuole
TGME49_314500	T.gondii	subtilisin-like protease TgSUB2	ApiLoc: localizes to apical
TGME49_280470	T.gondii	hypothetical protein	ApiLoc: localizes to nucleus
PF3D7_1108600	P.falciparum	endoplasmic reticulum-resident calcium binding protein	ApiLoc: localizes to endoplasmic reticulum
cgd1_3530	C.parvum	Gbp1/Gbp2p-like, putative single stranded G-strand telomeric DNA-binding protein	ApiLoc: localizes to nucleus
TGME49_200270	T.gondii	PAN domain-containing protein	ApiLoc: localizes to apical
PF3D7_1333700	P.falciparum	histone H3 variant, putative	ApiLoc: localizes to nucleus
PF3D7_1030200	P.falciparum	conserved Plasmodium protein, unknown function	ApiLoc: localizes to apical
TGME49_267680	T.gondii	microneme protein, putative	ApiLoc: localizes to apical
PF3D7_1147800.1	P.falciparum	merozoite adhesive erythrocytic binding protein	ApiLoc: localizes to parasite plasma membrane
PBANKA_091560	P.berghei	aquaglyceroporin	ApiLoc: localizes to parasite plasma membrane
TGME49_288650	T.gondii	hypothetical protein	ApiLoc: localizes to apical,parasitophorous vacuole
PF3D7_0207500	P.falciparum	serine repeat antigen 6	ApiLoc: localizes to parasitophorous vacuole
TGME49_203710	T.gondii	hypothetical protein	ApiLoc: localizes to nucleus
PVX_117880	P.vivax	hypothetical protein, conserved	ApiLoc: localizes to apical
TGME49_208030	T.gondii	microneme protein MIC4	ApiLoc: localizes to apical
PF3D7_1346800	P.falciparum	6-cysteine protein	ApiLoc: localizes to parasite plasma membrane
TGME49_310010	T.gondii	sushi domain-containing protein / SCR repeat-containing protein	ApiLoc: localizes to apical
PF3D7_1445400	P.falciparum	protein serine/threonine kinase-1	ApiLoc: localizes to nucleus
PF3D7_1341600	P.falciparum	dolichyl-phosphate-mannose-glygolipidalpha-mannosyltransferase, putative	ApiLoc: localizes to endoplasmic reticulum
TGME49_248340	T.gondii	GTP-binding nuclear protein RAN/TC4, putative	ApiLoc: localizes to nucleus
TGME49_289630	T.gondii	hypothetical protein	ApiLoc: localizes to apical
PF3D7_1115800	P.falciparum	conserved Plasmodium protein, unknown function	ApiLoc: localizes to apical
TGME49_262730	T.gondii	Rhoptry kinase family protein ROP16	ApiLoc: localizes to apical
TGME49_260190	T.gondii	microneme protein, putative	ApiLoc: localizes to apical
PBANKA_090130.1	P.berghei	merozoite adhesive erythrocytic binding protein	ApiLoc: localizes to apical
TGME49_251740	T.gondii	hypothetical protein	ApiLoc: localizes to nucleus
PF3D7_1252100	P.falciparum	conserved Plasmodium protein, unknown function	ApiLoc: localizes to parasitophorous vacuole
TGME49_261980	T.gondii	gorasp2-prov protein	ApiLoc: localizes to golgi apparatus
ETH_00013175	E.tenella	gi|37699787|emb|AJ586543.1| Eimeria tenella mRNA for surface antigen 13 (sag13 gene)	ApiLoc: localizes to parasite plasma membrane
PF3D7_1036400	P.falciparum	liver stage antigen 1	ApiLoc: localizes to parasitophorous vacuole
TGME49_209910	T.gondii	histone H2B variant 1	ApiLoc: localizes to not apicoplast,nucleus
PVX_086930	P.vivax	cytoadherence linked asexual protein (CLAG), putative	ApiLoc: localizes to apical
PF3D7_0903700	P.falciparum	alpha tubulin 1	ApiLoc: localizes to nucleus
